# Supplementary material for: Percutaneous endoscopic gastrostomy; evidence of different prognosis in various patient subgroups
Source: Oxford University Press journal article supplement (doi:10.1093/ageing/afi085), 2005-05-18
Supplement: afi085_Supplementary_Data.zip [file afi085_Supplementary_Data.zip]

**Appendix 1.** Median survival time after PEG insertion according to the Kaplan-Meier estimates (n = 674)

|                                | Number of patients | Median Survival (days) | 95% confidence interval (days) |
|--------------------------------|--------------------|------------------------|--------------------------------|
| Source of referral             |                    |                        |                                |
| Referral from hospital         | 244                | 161±9.9                | 115 - 232                      |
| Referral from the community    | 126                | 287±9.1                | 185 – 444                      |
| Referral from nursing home     | 304                | 423±9.1                | 258 - 654                      |
| Indication for PEG insertion   |                    |                        |                                |
| Feeding difficulty             | 280                | 203±±8.0               | 163 – 309                      |
| Recurrent aspiration pneumonia | 76                 | 267±9.6                | 124 – 654                      |
| Dysphagia due to stroke        | 362                | 327±9.3                | 247 – 507                      |
| Subgroups of demented patients |                    |                        |                                |
| Dementia > 80 years            | 254                | 172±4.9                | 126 - 242                      |
| Dementia & stroke              | 141                | 181±8.1                | 117 – 468                      |
| Dementia                       | 356                | 223±±8.4               | 173 – 309                      |
| Male, dementia, nursing home   | 64                 | 385±10.0               | 199 – 767                      |
| Dementia < 80                  | 102                | 467±6.4                | 242 - 1761                     |
| Miscellaneous                  |                    |                        |                                |
| Diabetes mellitus              | 98                 | 128±8.3                | 90 - 252                       |
| Male, < 80, nursing home       | 44                 | 457±8.1                | 255 - 1394                     |
| Female, < 80, nursing home     | 54                 | 780±6.9                | 359 - <sup>a</sup>             |

<sup>a</sup>Upper confidence interval limit could not be calculated
